## Manuscript title

Dynamic cerebral autoregulation during and 3 months after endovascular treatment in large-vessel occlusion stroke.

## Authors

Adam Vittrup Heiberg<sup>\*1,2</sup>, MD, Troels Gil Lukassen<sup>1</sup>, MD, Thomas Clement Truelssen<sup>1,2</sup>, MD, PhD, DMSc, Henrik Gutte Borgwardt<sup>3</sup>, MD, PhD, Goetz Benndorf<sup>5</sup>, MD, PhD, DMSc, Christine Sølling<sup>4</sup>, MD, PhD, Henrik Winther Schytz<sup>1,2</sup>, MD, PhD, DMSc, Kirsten Møller<sup>2,4</sup>, MD, PhD, DMSc, Klaus Hansen<sup>1,2</sup>, MD, DMSc, Helle Klingenberg Iversen<sup>1,2</sup> MD, DMSc

\* Corresponding author, adam.vittrup.heiberg@regionh.dk, Valdemar Hansens vej 13, N25, DK-2600 Glostrup, Denmark

<sup>1</sup> Department of Neurology, Copenhagen University Hospital - Rigshospitalet, Copenhagen, Denmark

<sup>2</sup> Department of Clinical Medicine, University of Copenhagen, Copenhagen, Denmark

<sup>3</sup> Department of Diagnostic Radiology, Copenhagen University Hospital - Rigshospitalet Copenhagen, Denmark

<sup>4</sup> Department of Neuroanaesthesiology, Copenhagen University Hospital - Rigshospitalet, Copenhagen, Denmark

<sup>5</sup> Department of Diagnostic Radiology, Baylor College of Medicine, Houston, Texas, USA

## Running headline

Cerebral autoregulation during EVT of stroke

## Word count

Not including list of Non-standard Abbreviations and Acronyms: 8431.

NOTE: This preprint reports new research that has not been certified by peer review and should not be used to guide clinical practice.

## Abstract

### Background

Acute ischemic stroke caused by large-vessel occlusion is effectively treated by endovascular treatment (EVT). However, treatment could be further refined by improved understanding of the underlying pathophysiology, including dynamic cerebral autoregulation (dCA). Near-infrared spectroscopy (NIRS) requires virtually no setup time and enables dCA investigation during EVT by measuring dynamic concentration in cortical oxygenated hemoglobin (OxyHb) continuously.

### Methods

The aim was to investigate dCA during EVT, before and after recanalization, and at follow-up after 24 hours and 90 days. We applied interhemispheric transfer function analysis of low-frequency (LF) oscillations (0.07-0.2 Hz) in OxyHb that yields the dCA measures, gain and phase shift. Mixed-effect models were used to examine dCA over time. We then predicted outcome by dCA in multivariate logistic regression models.

### Results

We found higher LF gain in patients with favorable outcome. While dCA was stable for most patients during EVT, LF phase shift increased immediately after recanalization for patients with milder symptom severity and at 24-hour follow-up for patients with more severe symptoms. Adjusted for age, infarct size before EVT, and recanalization success, average LF gain predicted independent functional outcome, symptom severity and mortality at 90-day follow-up.

### Conclusions

Interhemispheric transfer function analysis based on NIRS provides insights into dCA changes during EVT that could potentially be applied in the development of individualized treatment. The method relies on intact contralateral dCA which needs further investigations. The potential of dCA to strengthen prediction models also warrant additional examination.

### **Clinical Trial Registration**

ClinicalTrial.gov: NCT03738644. <https://clinicaltrials.gov/study/NCT03738644>.

### **Keywords**

Acute ischemic stroke; Endovascular treatment; Dynamic cerebral autoregulation; Near-infrared spectroscopy; Transfer function analysis

## **Non-standard Abbreviations and Acronyms**

ABP: Arterial Blood Pressure

ACA: Anterior Cerebral Artery

AIS: Acute Ischemic Stroke

ASPECTS: Alberta Stroke Program Early CT Score

BA: Basilar artery.

CW-NIRS: Continuous Wave Near-Infrared Spectroscopy

dCA: Dynamic Cerebral Autoregulation

DeoxyHb: Deoxygenated Hemoglobin Concentration

EVT: Endovascular Treatment

FU: Follow-up

FU<sub>24</sub>-group: All participants with sufficient data at PRE, POST and 24-hour FU.

FU<sub>90</sub>-group: All patients with sufficient data at PRE, POST, 24-hour and 90-day FU.

HF: High-frequency (0.2-0.5 Hz)

ICA: Internal carotid artery.

IVT: Intravenous thrombolysis.

LF: Low-frequency (0.07-0.2 Hz)

LFO: Low-frequency oscillations

LVO: Large-vessel Occlusion

M1: First part of middle cerebral artery.

M2: Second part of middle cerebral artery.

MCA: Middle Cerebral Artery

mRS: modified Rankin Scale

mTICI: Modified Treatment In Cerebral Infarction

NIHSS: National Institutes of Health Stroke Scale

NIRS: Near-Infrared Spectroscopy

OxyHb: Oxygenated Hemoglobin Concentration

PC-ASPECTS: Posterior circulation Alberta Stroke Program Early CT Score

PCA: Posterior cerebral artery.

POST: Second time segment (after achieving final reperfusion status)

PRE: First time segment (after sedation but before any attempted revascularization)

PSD: Power spectral

STROBE: STrengthening the Reporting of OBServational studies in Epidemiology

TFA: Transfer Function Analysis

TIA: Transient ischemic attack

VLF: Very low-frequency (0.02-0.07 Hz).

VMCA: Flow velocity in the Middle Cerebral Artery

## Introduction

Stroke remains a worldwide leading cause of disability and death despite the emergence of effective recanalization therapies.<sup>1</sup> Patients with a large-vessel occlusion (LVO) face the worst prognosis and constitute up to 38% of patients with acute ischemic stroke (AIS).<sup>2</sup> Endovascular treatment (EVT) drastically improves functional outcome after anterior circulation LVO when performed within 6 hours<sup>3</sup>, or within 24 hours in cases with mismatch between neurologic deficit and infarct core.<sup>4</sup> Posterior circulation EVT has shown similar advantages compared to best medical treatment.<sup>5</sup> However, procedure-related complications and futile recanalization still restrain the overall efficacy of EVT<sup>6,7</sup>. Impairment of cerebral autoregulation is one of the proposed mechanisms for unexplained futile recanalization.<sup>7,8</sup>

Cerebral autoregulation is the maintenance of suitable blood flow despite changes in cerebral perfusion pressure.<sup>9</sup> Dynamic cerebral autoregulation (dCA) determines how cerebral blood flow is regulated during rapid changes in perfusion pressure.<sup>10</sup> Prevailing methods indicate varying degrees of dCA impairment in patients with AIS including LVO<sup>8,11</sup> which could endanger vulnerable brain tissue by hypo- and hyperperfusion during and after EVT. Post-thrombectomy studies have shown dCA is an independent predictor of functional outcome<sup>12</sup>, and that it can be used to individualize blood pressure management.<sup>13</sup> However, dCA has never been examined before or during EVT.

Most dCA investigations rely on transcranial Doppler sonography examining blood flow velocity in the middle cerebral artery ( $V_{MCA}$ ) which requires expertise and setup time.<sup>14</sup> Assessment of dCA before EVT would compromise patient safety when every minute counts. Monitoring dCA during EVT also require modalities that do not interfere with the digital subtraction angiography. Near-

infrared spectroscopy (NIRS) is an optical method which continuously measures dynamic changes in cortical hemoglobin concentrations without needing significant setup time or causing artifacts on the digital subtraction angiography.<sup>15,16</sup>

Low-frequency oscillations (LFO, approximately 0.1 Hz) are prevalent in both systemic (i.e., arterial blood pressure, ABP) and cerebral circulation (e.g.,  $V_{MCA}$ , NIRS).<sup>15,17,18</sup> Quantifying the changes between them in the frequency domain by transfer function analysis (TFA) is one of the most utilized and standardized methods of assessing dCA.<sup>19,20</sup> Applying TFA for comparison of the NIRS signal between the unaffected and the ischemic hemisphere, we aimed to investigate dCA before, during and after EVT.

## Methods

This prospective observational study (ClinicalTrials.gov: NCT03738644) was conducted between November 2018 and November 2020 after approval from the Scientific Ethics Committees for the Capital Region of Denmark (H-18028704) and in accordance with the World Medical Association Declaration of Helsinki. All participants or their proxy signed written informed consent. Reporting complies with STrengthening the Reporting of OBservational studies in Epidemiology (STROBE) guidelines for observational studies.<sup>21</sup> Corresponding author had full access to all the data in the study and take responsibility for data integrity and analysis. Further methodical details are provided in supplementary materials.

All AIS patients admitted to Rigshospitalet with large-vessel occlusion receiving EVT were screened for eligibility. The exclusion criteria are shown in the enrollment flowchart (Figure 1). Patients with

bilateral infarction were excluded as no contralateral hemisphere could be defined (see interhemispheric transfer function analysis section).

Patients were diagnosed and treated as per standard-of-care. Large-vessel occlusion was confirmed and Alberta Stroke Program Early CT Score (ASPECTS)<sup>22</sup> or Posterior circulation-ASPECTS (PC-ASPECTS)<sup>23</sup> were determined by staff neuroradiologists assisted by RAPID AI software (iSchemaView, Menlo Park, California, USA) and dichotomized to favorable (ASPECTS/PC-ASPECTS  $\geq 6$ ) or unfavorable (ASPECTS/PC-ASPECTS  $< 6$ ). Patients were transferred immediately to the angiosuite where symptom severity was re-assessed using the National Institutes of Health Stroke Scale (NIHSS) before EVT was performed under general anesthesia. In addition to conventional monitoring,<sup>24</sup> NIRS was applied throughout the procedure (described below). Reperfusion success was assessed by the treating interventional neuroradiologist (modified Treatment In Cerebral Infarction, mTICI; Grade 0-2a unsuccessful achieving no reperfusion to reperfusion in less than half of the occluded artery territory; Grade 2b-3 successful reperfusion in more than half of the occluded artery territory or complete reperfusion).<sup>25</sup> Post-procedure, the patients were extubated as soon as possible and underwent dual-energy computed tomography (CT) or magnetic resonance imaging (MRI) after 24 hours to detect intracranial hemorrhage or other complications. Patients underwent further examinations as per standard-of-care. Stroke etiology was classified based on the Causative Classification System for Ischemic Stroke.<sup>26</sup>

### *Follow-up*

Patients had two follow-up (FU) examinations with NIRS in the supine position for 20 minutes after at least 5 minutes of rest. The first FU was performed 24 hours after EVT (+/- 6 hours from end of



endovascular reperfusion efforts) in addition to NIHSS assessment. The second FU was completed after 90 days (+/- 14 days) with functional outcome scored modified Rankin Scale (mRS) and independency (defined as mRS of 0-2) as well as NIHSS. Occurrence of re-hospitalizations, new vascular events (recurrent stroke, myocardial infarction, or surgery for peripheral artery disease) and all-cause mortality were registered. Patients unable to attend 90-day FU, were offered home visits within a 2-hour transportation radius. Patients who did not have in-person FU, were followed up by phone interview and using the electronic health record system.

### *NIRS examination*

The NIRS monitoring was performed using a continuous wave-NIRS (CW-NIRS) system (Octamon, Artinis Medical Systems, Elst, the Netherlands) with three long-distance channels (35 mm) per hemisphere, examining dynamic hemoglobin concentrations in the prefrontal cortex in the border zones between territories of the middle cerebral (MCA) and the anterior cerebral arteries (ACA) (two channels) and ACA territories exclusively (one channel per side).<sup>27</sup> A fourth channel with short diode-receiver distance (10 mm) mainly examined the extracerebral tissues on both sides.

### *Time segment selection*

Per recommendation from the Cerebrovascular Research Network only steady state data segments of five minutes were analyzed.<sup>20</sup> Thus, data segments were excluded within 5 minutes of inducing general anesthesia and within 2 minutes of changes in anesthetics, opioids, or vasopressors.<sup>28</sup> Very noisy data segments were also excluded from the analysis. Individual NIRS signal and all vitals were evaluated for steady state with an allowed variation of 10%. The first data segments free of these exclusionary criteria were chosen.

The first segment (PRE) occurred after sedation but before any attempted revascularization. The second data segment (POST) was just after the final reperfusion status was achieved, including the abandonment of reperfusion efforts. Third (24-hour) and fourth (90-day) data segments were selected based on the extent of motion artifacts. Patients who did not have complete PRE, POST and 24-hour segments were excluded from further analysis.

### *Interhemispheric transfer function analysis*

The Cerebrovascular Research Network guidelines for TFA<sup>20</sup> were adapted with minor exceptions described throughout. TFA was only performed on oxygenated hemoglobin (OxyHb) concentrations as they are more reliable<sup>29</sup> and better reflect the arterial compartment.<sup>15</sup> Input to TFA was OxyHb from the contralateral hemisphere, while the corresponding contralateral channel from the ischemic hemisphere served as output. Fourier transformation was performed, and gain (amplitude ratio) and phase shift were then calculated in three frequency intervals: High-frequency (HF, 0.2-0.5 Hz), low-frequency (LF, 0.07-0.2 Hz) and very low-frequency (VLF, 0.02-0.07 Hz). Power spectral density (PSD) specified amplitudes ( $(\mu\text{M}\cdot\text{mm})^2/\text{Hz}$ ) for each hemisphere.

Positive phase shifts denoted LFOs in the contralateral hemisphere occurring before LFOs in the ischemic hemisphere and vice versa. Because dyssynchronization of phase shifts can occur in either direction, absolute phase shift was calculated. Similarly, gain of more than 1 resulted from amplitudes in the ischemic hemisphere exceeding amplitudes in the contralateral hemisphere and vice versa. Theoretically, dCA would be deemed intact with no substantial phase shift and gain equal to one. This interpretation assumes dCA in the contralateral hemisphere is intact.

Any differences between input and output signals were assumed to result from intracerebral changes as extracerebral circulation is not under the influence of cerebral autoregulation. We tested this assumption by performing a TFA between short-distance channels from each side with the contralateral side as input and the affected side as output at 24-hour FU, under which the clinical condition was most stable and less prone to artifacts. Segment selection, data preparation and TFA methodology were equal to the processing for long-distance channels described above. Unfortunately, short-distance channels are more prone to oversaturation, reducing the number of channels with adequate data quality, especially in acute settings. Thus, incorporation of short-distance channel TFA in statistical models was not possible.

### *Statistics*

Statistical analysis was performed in two subsets of participants: 1) All participants with sufficient data at PRE, POST and 24-hour FU (FU<sub>24</sub>-group) 2) All patients with sufficient data at PRE, POST, 24-hour and 90-day FU (FU<sub>90</sub>-group) excluding patients with no in-person FU and patients who died. Baseline data from subjects without in-person FU was also analyzed to identify differences in subsets.

Normally distributed data are presented as mean and standard deviation (SD), while non-normal data are presented as median and interquartile range (IQR). Two-sample testing was performed as appropriate. False discovery rate was applied when performing multiple comparisons.

Linear mixed-effect models were fitted with LF gain or LF absolute phase shift as outcome, subjects as random effects, and fixed effects comprised of time segment in addition to and different patient characteristics (e.g., stroke etiology, age, favorable ASPECTS before EVT, anterior or posterior circulation stroke), treatment (e.g., anesthesia, vasopressor, successful recanalization) or outcome (e.g., NIHSS, mRS, mortality). In case of significant fixed effects, mixed-effect models were fitted with LF PSD from each hemisphere as an outcome to examine the LFO amplitude in each hemisphere. Interaction between time segment and other fixed effects were assessed to determine different temporal developments between groups.

Significant fixed effects from mixed-effect models were used as outcome in logistic regression models with corresponding TFA parameter as univariate predictor. Two multivariate predictions were then performed. The acute prediction model was adjusted for age, recanalization success, and favorable ASPECTS/PC-ASPECTS.<sup>30</sup> NIHSS was not used as co-variate as some patients were intubated before arrival in the angi suite and did not have a NIHSS before EVT. The 24-hour prediction was modelled with 24-hour NIHSS and age as co-variables. For dichotomous outcomes, receiver operating characteristics curves were generated, and area under the receiver operating characteristic curve (AUROC) was generated to assess the accuracy of the predictor in both univariate and multivariate models without validation subsets.

Models estimates ( $\beta$ ) are presented with 95% confidence intervals (CI). Significance level was chosen at 5%.

## Results

### *Baseline characteristics*

Baseline information and medical history of all enrolled subjects and grouped into subjects with and without in-person 90-day FU are listed in Table 1 and Table S1. No differences between the FU and non-FU groups were detected.

Index stroke characteristics, treatment and outcome are listed in Table 2 and Table S2. Most of the living patients had in-person FU (82.8%). There were no significant differences concerning etiology, onset, occluded artery, procedural technique, complications, anesthetics, or vasopressors. Subjects who did not complete the 90 day-FU had higher NIHSS before EVT, lower proportion of successful reperfusion and longer time from last-known-well to reperfusion possibly leading to lower 24-hour ASPECTS/PC-ASPECTS as well as higher 24-hour NIHSS, 90-day mRS, and all cause-mortality. Non-FU subjects also experienced a numerically higher occurrence of complications and vascular events. Removing subjects with fatal outcome within 90 days from the non-FU group, did not alter the differences between groups (data not shown).

### *Short distance channels TFA*

TFA of short distance channel at 24-hour FU is shown in Table S3. Across frequency ranges, gain did not differ from 1 and phase shift did not differ from 0. We found no side-to-side difference for mean OxyHb and PSD.

### *Average TFA results*

The median time from last-known-well to PRE was 4.0 hours (2.5; 7.9). Mean OxyHb decreased at both POST and 24-hour FU similarly in both hemispheres. PSD increased bilaterally in both VLF and LF range after 24 hours. Overall, vitals were quite steady. TFA showed increased absolute phase

difference after 24 hours in the LF range and a temporary reduction after recanalization in the VLF range normalizing after 24 hours. Mean OxyHb, vital parameters, PSD, and the results of the TFA for the FU<sub>24</sub>-group are listed in Table S3.

In all ranges, FU subjects showed a PSD reduction between 24 hours and 90 days. Coherence and gain were stable between 24 hours and 90 days. LF and VFL absolute phase differences showed significant reduction, while quite stable in other ranges. All results for the FU<sub>90</sub>-group are shown in Table S4.

## **Mixed-effect models**

### *LF gain*

In the FU<sub>24</sub>-group LF gain was significantly lower in subjects with increasing mRS ( $\beta=-0.04$ , CI=[-0.07; -0.02],  $p=0.002$ ), dependent outcome ( $\beta=-0.13$ , CI=[-0.24; -0.02],  $p=0.019$ ), increasing NIHSS ( $\beta=-1.0\%$ , CI=[-1.8%; -0.1%],  $p=0.029$ ), and in subjects with fatal 90-day outcome ( $\beta=-0.21$ , CI=[-0.35; -0.06],  $p=0.005$ ) across PRE, POST and 24-hour data segments. The observed reduction in LF gain was the result of greater PSD reduction in the ischemic hemisphere.

Grouping patients by anesthetics, vasopressor, stroke etiology (large-artery atherosclerosis or cardioembolic), age, occlusion complication level (simple isolated thrombus or complicated ICA-top or tandem thrombus), favorable ASPECTS/PC-ASPECTS before EVT, anterior or posterior circulation stroke, and hypotension during recording (average mean arterial pressure (MAP) < 70 mmHg) had no effect on LF gain. Grouping patients by recanalization success (unsuccessful:  $\beta=-0.15$ , CI=[-0.33; 0.03] ,  $p=0.105$ ) and hypertension (MAP < 130 mmHg before recanalization or 90 mmHg after

recanalization) during recording ( $\beta=0.09$ ,  $CI=[-0.01; 0.19]$ ,  $p=0.082$ ) showed no statistical change in LF gain. There was no interaction effect between the time segment and any other fixed effects. Time segment had no effect on LF gain with PRE as index.

Associations between LF gain and outcome were not prevalent in the FU<sub>90</sub> group. While LF gain was still numerically lower in subjects with worse outcomes, the difference did not reach a significance level. In contrast to FU<sub>24</sub>-group a significant interaction effect between favorable ASPECTS/PC-ASPECTS and the time segment was observed ( $p=0.035$ ) as LF gain increased more after recanalization and declined more at 24-hour and 90-day FU in patients with non-favorable ASPECTS/PC-ASPECTS. The interaction effect is plotted in Figure S1. LF gain was numerically lower at 24-hour and 90-day FU with PRE as index and significantly lower compared to POST.

#### *LF phase shift*

Mixed-effect models showed no effect on absolute phase shift of grouping patients by mRS, mortality, vasopressor, stroke etiology, age, occlusion complication level, favorable ASPECTS/PC-ASPECTS before EVT, anterior or posterior circulation stroke, hypotension nor hypertension during recording. Compared to patients anesthetized with propofol, those receiving sevoflurane showed a trend towards numerically lower absolute phase shift ( $\beta=-46.0\%$ ,  $CI=[-71.9\%; +3.9\%]$ ,  $p=0.064$ ). We found an interaction between NIHSS and time segment as subjects with milder stroke severity had an immediate increase in absolute phase shift after recanalization, as opposed to patients with greater stroke severity increasing in absolute phase shift between POST and 24-hour FU (Figure 2).

Results from 24-hour and 90-day subsets was equivalent. Absolute phase shift decreased between 24-hour and 90-day FU and was not different from index (PRE) at 90-day FU.

All results from linear mixed-effect models can be found in Table S6-S9.

### **Prediction models**

LF gain showed associations to outcome and therefore, was used as co-variate in the following prediction models. LF gain was averaged across PRE, POST, and 24-hour FU because mixed-effects models showed no effect of time segment on LF gain. Thus, average LF gain was representable for LF gain in the first 24 hours. It could theoretically still be used to predict outcome in the large proportion of enrolled subjects excluded from analysis due to missing state period (16%). The full output from multivariate models is reported in supplementary materials.

#### *Modified Rankin scale*

Logistic regression models were used to predict 90-day independent (mRS 0-2) or dependent (mRS > 2) functional outcome with LF gain as predicting variable. Average LF gain was significant predictor of independent outcome ( $\beta=2.36$ , CI=[0.41; 4.53],  $p=0.023$ , AUROC=0.641) with an odds ratio (OR) of 1.60 (CI=[1.07;2.41]) for a 0.2 increase in LF gain.

In the acute predictions model (adjusted for age, recanalization, and favorable ASPECTS/PC-ASPECTS before EVT), average LF gain remained a significant predictor of independent outcome ( $\beta=2.60$ , CI=[0.32; 5.22],  $p=0.035$ , AUROC=0.802, Table S10) with an OR of 1.68 (CI=[1.04; 2.73]) for a 0.2 increase in LF gain. Age was the only other significant predictor.



The 24-hour model adjusted for age and trichotomized 24-hour NIHSS (0-5; 6-13; >14) and showed that LF gain ( $\beta=2.29$ , CI=[-0.14; 5.11],  $p=0.081$ , AUROC=0.876, Table S11) had an OR of 1.58 (CI=[0.94; 2.65] for 90-day independency with a 0.2 increment. Age and trichotomized 24-hour NIHSS were significant predictors.

### *NIHSS*

Predicting 1-step changes in 90-day NIHSS is of minor clinical significance prompting NIHSS categorization (Near-remission 0-1; Mild 2-3; Moderate 4-6; Severe 7-18; Fatal outcome). Ordinal logistic regression model was used to predict 90-day categorized NIHSS with average LF gain as a significant predictor ( $\beta=2.14$ , CI=[0.42; 3.94],  $p=0.016$ ). With an increase of 0.2 in LF gain, the common OR was 1.53 (CI=[1.08;2.17]) for better categorical 90-day NIHSS. Predicted probabilities for the univariate model is depicted in Figure 3.

In multivariate acute prediction, LF gain remained a significant predictor ( $\beta=2.26$ , CI=[0.45; 4.19],  $p=0.017$ , Table S12) with a common OR of 1.57 (CI=[1.08; 2.28]) for better categorical 90-day NIHSS. Favorable ASPECTS/PC-ASPECTS before EVT was the only other significant predictor.

The 24-hour model showed average LF gain ( $\beta=3.11$ , CI=[-0.46; 3.66],  $p=0.072$ , AUROC=0.876, Table S13) had an OR of 1.37 (CI=[0.91; 2.07] for better categorical 90-day NIHSS with a 0.2 increment.

### *Mortality*

Logistic regression models were used to predict 90-day survival. In the univariate model, average LF gain was a significant predictor of 90-day survival ( $\beta=3.73$ , CI=[1.04; 6.85],  $p=0.011$ , AUROC=0.716) with an OR of 2.11 (CI=[1.19; 3.73]) for a 0.2 increase in LF gain. In the acute model, average LF gain remained a significant predictor of 90-day survival ( $\beta=3.78$ , CI=[0.77; 7.35],  $p=0.022$ , AUROC=0.863,

Table S14) with an OR of 2.13 (CI=[1.12; 4.06]) for a 0.2 increase in LF gain. The 24-hour model (Table S15) was strongly affected by collinearity between trichotomized NIHSS and LF gain.

## Discussion

Dynamic CA (dCA) in AIS is of immense interest due to its pathophysiological role and consistent association with long-term outcome.<sup>8,31</sup> Further, dCA has shown promising potential for individualized blood pressure management after thrombectomy.<sup>13</sup> In order to investigate the potential for individualizing intraprocedural treatment it is important to study dCA in the hyperacute phase of stroke and large-vessel occlusion before, during and after revascularization. By our account, this study is the first to examine dCA not only during EVT but also before and after recanalization and possibly the earliest dCA assessment after ischemic stroke. Here, we have shown the time course of interhemispheric TFA based on cortical OxyHb across hyperacute, acute, and chronic phases of large-vessel occlusion and that LF gain was associated with and thus had predictive capabilities of 90-day symptom severity, functional outcome, and mortality.

### *Phase shift*

Studies of dCA in AIS patients have predominantly been based on transcranial Doppler sonography and TFA between ABP and  $V_{MCA}$ . Associations between impaired dCA in the ischemic hemisphere and poor outcome have been shown in numerous studies regarding infarct size, edema, hemorrhagic transformation, symptom severity at discharge and long-term functional outcome (mRS) but mostly with LF phase shift as covariate.<sup>8,32</sup>

While we did not find associations between interhemispheric phase shift and functional outcome, our data did show an interaction between NIHSS and time segments. Absolute phase shift increased immediately after recanalization in patients with milder symptom severity whereas patients with higher NIHSS exhibited an increase at 24-hour FU. The differences in temporal development of phase shift dyssynchronization could be related to the penumbra as there were no effect of ASPECTS/PC-ASPECTS or the recanalization success. Dichotomizing recanalization to complete (mTICI 3) or incomplete (mTICI 2a or 2b), Sheriff et al. also showed an interaction effect when examining ABP- $V_{MCA}$  phase shift over time. Such interactions emphasize the importance of examination time and the need to account for clinical characteristics when studying dCA in AIS patients. Phase shift between ABP and  $V_{MCA}$  have shown no interhemispheric difference within 6 hours of onset with moderate to severe stroke symptoms in the MCA territory.<sup>33</sup> Later, reductions compared to healthy controls and contralateral hemisphere are consistently seen from 20 hours and throughout 7 days from onset in patients with MCA occlusion,<sup>12,34,35</sup> while perhaps already normalizing after 10 days.<sup>34</sup>

Using interhemispheric TFA, we found an absolute phase shift relatively close to 0, indicating equal dCA across hemispheres. Studies of contralateral phase shift dyssynchronization have shown inconsistent results which could result from vasoactive substances accumulating especially in LVO and affecting dCA even in the contralateral hemisphere.<sup>7,8</sup> Contralateral dyssynchronization could explain why we found no association to functional outcome that is otherwise reported quite consistently in TFA of ABP- $V_{MCA}$  in the ischemic hemisphere. Examining bilateral ABP- $V_{MCA}$  phase shift and interhemispheric phase shift concurrently could reveal this in the future. In this study,

simultaneous interhemispheric TFA and bilateral ABP-OxyHb TFA would have diminished the sample size greatly as many patients did not have sufficient ABP segments before recanalization.

While TFA of ABP and  $V_{MCA}$  have been used in many studies of AIS patients, only one study has previously used OxyHb as both input and output.<sup>36</sup> This study was performed 1-2 days after onset and showed increased LF absolute phase shift in non-thrombolized patients compared to thrombolized patients. The thrombolized patients had a higher NIHSS at admission, but a higher rate of total remission and conceivably less infarction volume, perhaps resulting in equal dCA across both hemispheres. The current study found no such difference as effect of recanalization success probably because of significant differences concerning study design, cohort and TFA methodology.

### *Gain*

Similar to the current study, Castro et al. showed that LF gain between ABP and  $V_{MCA}$  in the affected hemisphere of moderate to severe MCA strokes within 6 hours of onset was a predictor of 90-day dependency.<sup>37</sup> Gain remained stable between hyperacute (<6 hours), acute (24 hours) and chronic (90-day) stroke stages,<sup>37</sup> while inconsistent findings are reported in the subacute stage (3 to 7 days after onset).<sup>38,39</sup> However, gain in the ischemic hemisphere increased with outcome severity, interpreted as an increasingly impaired dCA with a diminished ability to dampen the amplitude of LFOs from systemic perfusion.<sup>40</sup> Conversely, a recent meta-analysis found lower gain and thus more intact dCA across all AIS patients compared to healthy controls.<sup>11</sup> The inconsistencies concerning ABP- $V_{MCA}$  gain could be explained by heterogeneities between stroke populations and methodical variability including scaling methods that is required when using different modalities in TFA. LF gain in patients with favorable outcome from the current cohort was close to one, indicating equal dCA

between hemispheres and intact dCA in the ischemic hemisphere under the assumption of intact contralateral dCA. With increasing outcome severity, LFO amplitude was relatively stable in the contralateral hemisphere while LFO amplitude in the ischemic hemisphere declined resulting in lower gain likely due to affected dCA. Thus, direct comparisons of LF gain between conventional TFA setup (ABP- $V_{MCA}$ ) and interhemispheric TFA seems implausible perhaps due to differences in the examined vasculature. NIRS should be sensitive to all microvascular regulations, while that may not be true for  $V_{MCA}$ , which is based on upstream arteriolar resistance.<sup>41</sup> Multiple TFAs based on simultaneous measurements of ABP,  $V_{MCA}$  and OxyHb would be needed in the future to determine how different TFA models interact.

We can only compare amplitude and gain directly to subacute patients examined by Phillip et al.<sup>42</sup> Numerically amplitude in the ischemic hemisphere was higher resulting in higher gain in thrombolized patients while neither reached statistical significance.<sup>36</sup> This could be consistent with the current study as thrombolized patients had higher remission rate than non-thrombolized patients, but NIHSS at time of examination and long-term outcome is unknown.

LF gain was a significant predictor of 90-day categorized NIHSS, functional independency and mortality after adjusting for age, recanalization success, and favorable ASPECTS/PC-ASPECTS before EVT. However, with the added knowledge at 24-hour FU, trichotomized NIHSS seemed to confound the effect of average LF gain on predictions of independency and categorized NIHSS at 90-day FU. Average LF gain could still be impactful in the 24-hour prediction model especially when 24-hour NIHSS is unknown (e.g., due to prolonged intubation).

### *Strengths and limitations*

In this study, we applied one of the most frequently used and standardized methods to evaluate dCA, though with the novelty adjustment of using NIRS signals as both input and output. There are certain advantages to this approach. First, the setup of NIRS does not require expertise and takes less than 60 seconds enabling dCA studies in hyperacute settings before recanalization therapies without compromising patient safety. Second, only very few patients cannot be examined with NIRS due to extracranial hematomas or poor signal quality. Third, no scaling is required to adjust for different measurement modalities, removing any uncertainty concerning the scaling method. Lastly, while extracranial tissue contributes to the long-distance signal, the applied model accounts for that because LFO in the extracerebral tissue can reasonably be assumed to be static and without regional differences. This assumption was upheld in the short-distance channel TFA. Also, there is absolute certainty of intracerebral signal component due to contrast artifacts in all long-distance channels. Thus, we are confident that any changes in LF gain or phase shift are due to intracerebral changes, i.e. dynamic autoregulation.

Other approaches to study dCA exclusively by NIRS have been applied previously. Interestingly, Becker et al. interestingly proposed to use short-distance channels as both regressors to the long-distance channel and as input to the TFA as surrogate of systemic perfusion.<sup>43</sup> This approach shares some of the advantages of our method while also enabling regional dCA examination in both hemispheres. However, it also requires sufficient data quality of short-distance channels, which are more prone to detector saturation and ultimately hinder the incorporation of results from short-distance channel TFA as variables in our statistical models. Short-distance channels also have a small intracerebral signal component and cannot be thought of as purely representative of systemic

perfusion.<sup>44</sup> This was also evident in our data as contrast artifacts appeared concurrently in some short-distance channels, albeit at a much lower intensity than in long-distance channels. The intracerebral component with dCA changes could also explain some of the variance in our short-distance channel TFA. Although regression of short-distance channels improves intracerebral sensitivity,<sup>45</sup> regression methods have substantial heterogeneity and are tainted by the trade-off between sacrificing intracerebral signals and accepting extracerebral contamination. Even NIRS oximeters with multi-distance channels (spatially resolved spectroscopy-NIRS) commercially available for clinical use have demonstrated extracerebral contamination and have the added uncertainties of proprietary processing resulting in different values of cortical hemoglobin saturation<sup>46,47</sup> which renders reproducibility across NIRS devices impossible. Also, NIRS oximeters could easily have overlooked contrast artifacts, which ensured an intracerebral signal component but should be eliminated from TFA segments.

Another NIRS-only approach to examine phase shift was shown by Elting et al. who applied TFA between OxyHb and deoxygenated hemoglobin (DeoxyHb) from single channels measurements with spatially resolved spectroscopy-NIRS. Accounting for transit time (HF phase shift), this approach produced similar phase shift to TFA between ABP and  $V_{MCA}$ .<sup>48</sup> This method was also feasible in ICU patients with neurologic disease,<sup>49</sup> but has never been applied in acute settings nor in AIS patients alone. Whether such an approach can be reproduced with CW-NIRS remains unanswered. Here, we choose to analyze OxyHb alone as the signal quality is better than DeoxyHb especially in hyperacute settings.

Various limitations restrict the conclusions from this study. Interhemispheric TFA examines dCA relative to the contralateral hemisphere. While amplitude can be assessed per hemisphere (PSD) phase shift cannot. This leaves uncertainty as to whether phase shift is equally impaired or equally intact in patients with large-vessel occlusions when not doing simultaneous TFA between ABP and OxyHb on each hemisphere. Also, we had no control group of healthy subjects to compare with.

ACS patients including those receiving EVT are inherently heterogeneous concerning stroke etiology, co-morbidities, imaging parameters, and treatment. In this study we chose to prioritize everyday generalizability and not exclude patients based on heterogeneities, but account for as many of them as possible in the statistical models instead. However, accounting for all heterogeneities is nearly impossible and requires a very large sample size especially for less common occurrences (e.g., etiologies, infarct locations, co-morbidities, concomitant treatment). One such example could be patients receiving sevoflurane to maintain general anesthesia which could affect dCA differently from patients receiving propofol.<sup>50</sup> LFO amplitude was lower during EVT regardless of anesthetics, but gain was unaltered. Our results show uncertainty concerning sevoflurane effect on interhemispheric phase shift, and thus sevoflurane subjects remained in all analysis.

The main exclusion criteria from patients examined with NIRS was the absence of a steady state period mainly before recanalization. Reasons for this were a short procedural time to access the occlusion and attempt recanalization within exclusion period after intubation, difficulties to establish steady state, e.g. due to cardiovascular comorbidity as well as high or low sensitivity to anesthetics or vasopressors. Therefore, we believe no selection bias has been introduced by data segment selection.



We did not evaluate collateral circulation due to differences in standard-of-care imaging (CT-angiography, MRI time-of-flight angiography) and missing contralateral series from the digital subtraction angiography. Collateral circulation could certainly have an impact on both outcome and dCA.<sup>51,52</sup> However, collaterals are better developed in patients with large-artery stenosis compared to patients with cardioembolic stroke etiology and we did not find any effect of etiology.

Results from the FU<sub>90</sub>-group should be interpreted with caution as non-FU patients did not attend mainly due to very poor functional or fatal outcome. Efforts were made to minimize this trend by offering FU visits at the rehabilitation center or at home visits despite COVID-19 restrictions. The exclusion of a significant portion of patients with the worst outcome may explain why associations between LF gain and outcome were not significant in the FU<sub>90</sub>-group.

In conclusion, interhemispheric TFA based on NIRS is a feasible method for investigating dCA in AIS patients before, during and after EVT. LF gain remained stable during EVT up to 90 days post-treatment and had associations to as well as predictive capabilities of long-term symptom severity, functional outcome, and mortality. Development of LF phase shifts depended on symptom severity and increased immediately after recanalization in AIS patient with lower NIHSS. Further studies involving concurrent dCA investigations using different modalities are warranted to assess dCA in the contralateral hemisphere and to validate interhemispheric TFA but will also advance our understanding of the relations between different TFA models for studying dCA.

## **Acknowledgements**

We gratefully appreciate all the patients for their participation and thank all members of staff for their help in patient recruitment and executing the study.

## **Declaration of interests**

The authors declare that there is no conflict of interest.

## **Funding**

The study was supported by Simon Fougner Hartmanns Family Foundation, Gangsted Foundation, Sophus Jacobsen Foundation and Rigshospitalet's Research Foundation.

## **Supplemental Material**

Supplemental Methods

Figure S1

Tables S1–S15

References no. 53-63

## **Author contributions**

AVH and HKI conceived and designed the study with contributions from TCT, HGB, GB, CS, and HWS. AVH acquired the data with major contributions from TGL as well as TCT, HGB, GB, CS and KH. AVH performed data analysis with contributions from TGL and HKI. All authors contributed to interpretation of results. AVH drafted the article. All authors revised the article critically and approved the final version.

## Data availability statement

All processing code is open source available. NIRS data segments can be provided upon reasonable request. Individual patient data are identifiable, and availability requires approval of both centers as well as local ethics committees.

## References

1. Martin SS, Aday AW, Almarzooq ZI, Anderson CAM, Arora P, Avery CL, Baker-Smith CM, Barone Gibbs B, Beaton AZ, Boehme AK, et al. 2024 Heart Disease and Stroke Statistics: A Report of US and Global Data From the American Heart Association. *Circulation*. 2024;149:e347-e913. doi: 10.1161/cir.0000000000001209
2. Malhotra K, Gornbein J, Saver JL. Ischemic Strokes Due to Large-Vessel Occlusions Contribute Disproportionately to Stroke-Related Dependence and Death: A Review. *Front Neurol*. 2017;8:651. doi: 10.3389/fneur.2017.00651
3. Goyal M, Menon BK, van Zwam WH, Dippel DW, Mitchell PJ, Demchuk AM, Dávalos A, Majoie CB, van der Lugt A, de Miquel MA, et al. Endovascular thrombectomy after large-vessel ischaemic stroke: a meta-analysis of individual patient data from five randomised trials. *Lancet (London, England)*. 2016;387:1723-1731. doi: 10.1016/s0140-6736(16)00163-x
4. Nogueira RG, Jadhav AP, Haussen DC, Bonafe A, Budzik RF, Bhuva P, Yavagal DR, Ribo M, Cognard C, Hanel RA, et al. Thrombectomy 6 to 24 Hours after Stroke with a Mismatch between Deficit and Infarct. *The New England journal of medicine*. 2018;378:11-21. doi: 10.1056/NEJMoa1706442
5. Baik SH, Kim JY, Jung C. A Review of Endovascular Treatment for Posterior Circulation Strokes. *Neurointervention*. 2023;18:90-106. doi: 10.5469/neuroint.2023.00213
6. Balami JS, White PM, McMeekin PJ, Ford GA, Buchan AM. Complications of endovascular treatment for acute ischemic stroke: Prevention and management. *International journal of stroke : official journal of the International Stroke Society*. 2018;13:348-361. doi: 10.1177/1747493017743051
7. Wang L, Xiong Y. Advances in Futile Reperfusion following Endovascular Treatment in Acute Ischemic Stroke due to Large Vessel Occlusion. *Eur Neurol*. 2023;86:95-106. doi: 10.1159/000528922
8. Nogueira RC, Aries M, Minhas JS, N HP, Xiong L, Kainerstorfer JM, Castro P. Review of studies on dynamic cerebral autoregulation in the acute phase of stroke and the relationship with clinical outcome. *J Cereb Blood Flow Metab*. 2022;42:430-453. doi: 10.1177/0271678x211045222
9. Paulson OB, Strandgaard S, Edvinsson L. Cerebral autoregulation. In: *Cerebrovasc Brain Metab Rev*. 1990:161-192.

10. Claassen J, Thijssen DHJ, Panerai RB, Faraci FM. Regulation of cerebral blood flow in humans: physiology and clinical implications of autoregulation. *Physiological reviews*. 2021;101:1487-1559. doi: 10.1152/physrev.00022.2020
11. Intharakham K, Beishon L, Panerai RB, Haunton VJ, Robinson TG. Assessment of cerebral autoregulation in stroke: A systematic review and meta-analysis of studies at rest. *J Cereb Blood Flow Metab*. 2019;39:2105-2116. doi: 10.1177/0271678x19871013
12. Tian G, Ji Z, Huang K, Lin Z, Pan S, Wu Y. Dynamic cerebral autoregulation is an independent outcome predictor of acute ischemic stroke after endovascular therapy. *BMC Neurol*. 2020;20:189. doi: 10.1186/s12883-020-01737-w
13. Petersen NH, Silverman A, Strander SM, Kodali S, Wang A, Sansing LH, Schindler JL, Falcone GJ, Gilmore EJ, Jasne AS, et al. Fixed Compared With Autoregulation-Oriented Blood Pressure Thresholds After Mechanical Thrombectomy for Ischemic Stroke. *Stroke*. 2020;Strokeaha119026596. doi: 10.1161/strokeaha.119.026596
14. Nedelmann M, Stolz E, Gerriets T, Baumgartner RW, Malferrari G, Seidel G, Kaps M. Consensus recommendations for transcranial color-coded duplex sonography for the assessment of intracranial arteries in clinical trials on acute stroke. *Stroke*. 2009;40:3238-3244. doi: 10.1161/strokeaha.109.555169
15. Andersen AV, Simonsen SA, Schytz HW, Iversen HK. Assessing low-frequency oscillations in cerebrovascular diseases and related conditions with near-infrared spectroscopy: a plausible method for evaluating cerebral autoregulation? *Neurophotonics*. 2018;5:5 - 5 - 14. doi: 10.1117/1.NPh.5.3.030901
16. Quaresima V, Ferrari M. A Mini-Review on Functional Near-Infrared Spectroscopy (fNIRS): Where Do We Stand, and Where Should We Go? *Photonics*. 2019;6:87.
17. Obrig H, Neufang M, Wenzel R, Kohl M, Steinbrink J, Einhaupl K, Villringer A. Spontaneous low frequency oscillations of cerebral hemodynamics and metabolism in human adults. *Neuroimage*. 2000;12:623-639. doi: 10.1006/nimg.2000.0657
18. Reinhard M, Wehrle-Wieland E, Grabiak D, Roth M, Guschlbauer B, Timmer J, Weiller C, Hetzel A. Oscillatory cerebral hemodynamics--the macro- vs. microvascular level. *J Neurol Sci*. 2006;250:103-109. doi: 10.1016/j.jns.2006.07.011
19. Liu X, Czosnyka M, Donnelly J, Cardim D, Cabeleira M, Lalou DA, Hu X, Hutchinson PJ, Smielewski P. Assessment of cerebral autoregulation indices - a modelling perspective. *Sci Rep*. 2020;10:9600. doi: 10.1038/s41598-020-66346-6
20. Panerai RB, Brassard P, Burma JS, Castro P, Claassen JA, van Lieshout JJ, Liu J, Lucas SJ, Minhas JS, Mitsis GD, et al. Transfer function analysis of dynamic cerebral autoregulation: A CARNet white paper 2022 update. *J Cereb Blood Flow Metab*. 2023;43:3-25. doi: 10.1177/0271678x221119760
21. von Elm E, Altman DG, Egger M, Pocock SJ, Gøtzsche PC, Vandenbroucke JP. The Strengthening the Reporting of Observational Studies in Epidemiology (STROBE) Statement: guidelines for reporting observational studies. *Int J Surg*. 2014;12:1495-1499. doi: 10.1016/j.ijso.2014.07.013
22. Barber PA, Demchuk AM, Zhang J, Buchan AM. Validity and reliability of a quantitative computed tomography score in predicting outcome of hyperacute stroke before thrombolytic therapy. ASPECTS Study Group. Alberta Stroke Programme Early CT Score. *Lancet (London, England)*. 2000;355:1670-1674. doi: 10.1016/s0140-6736(00)02237-6

23. Puetz V, Sylaja PN, Coutts SB, Hill MD, Dzialowski I, Mueller P, Becker U, Urban G, O'Reilly C, Barber PA, et al. Extent of hypoattenuation on CT angiography source images predicts functional outcome in patients with basilar artery occlusion. *Stroke*. 2008;39:2485-2490. doi: 10.1161/strokeaha.107.511162
24. Karippacheril JG, Ho TY. Data acquisition from S/5 GE Datex anesthesia monitor using VSCapture: An open source.NET/Mono tool. *J Anaesthesiol Clin Pharmacol*. 2013;29:423-424. doi: 10.4103/0970-9185.117096
25. Zaidat OO, Yoo AJ, Khatri P, Tomsick TA, von Kummer R, Saver JL, Marks MP, Prabhakaran S, Kallmes DF, Fitzsimmons BF, et al. Recommendations on angiographic revascularization grading standards for acute ischemic stroke: a consensus statement. *Stroke*. 2013;44:2650-2663. doi: 10.1161/strokeaha.113.001972
26. Ay H, Benner T, Arsava EM, Furie KL, Singhal AB, Jensen MB, Ayata C, Towfighi A, Smith EE, Chong JY, et al. A computerized algorithm for etiologic classification of ischemic stroke: the Causative Classification of Stroke System. *Stroke*. 2007;38:2979-2984. doi: 10.1161/strokeaha.107.490896
27. Koenig J, Höper S, van der Venne P, Mürner-Lavanchy I, Resch F, Kaess M. Resting state prefrontal cortex oxygenation in adolescent non-suicidal self-injury - A near-infrared spectroscopy study. *Neuroimage Clin*. 2021;31:102704. doi: 10.1016/j.nicl.2021.102704
28. Llwyd O, Fan JL, Müller M. Effect of drug interventions on cerebral hemodynamics in ischemic stroke patients. *J Cereb Blood Flow Metab*. 2022;42:471-485. doi: 10.1177/0271678x211058261
29. Strangman G, Culver JP, Thompson JH, Boas DA. A quantitative comparison of simultaneous BOLD fMRI and NIRS recordings during functional brain activation. *Neuroimage*. 2002;17:719-731.
30. Powers WJ, Derdeyn CP, Biller J, Coffey CS, Hoh BL, Jauch EC, Johnston KC, Johnston SC, Khalessi AA, Kidwell CS, et al. 2015 American Heart Association/American Stroke Association Focused Update of the 2013 Guidelines for the Early Management of Patients With Acute Ischemic Stroke Regarding Endovascular Treatment: A Guideline for Healthcare Professionals From the American Heart Association/American Stroke Association. *Stroke*. 2015;46:3020-3035. doi: 10.1161/str.0000000000000074
31. Fan JL, Brassard P, Rickards CA, Nogueira RC, Nasr N, McBryde FD, Fisher JP, Tzeng YC. Integrative cerebral blood flow regulation in ischemic stroke. *J Cereb Blood Flow Metab*. 2022;42:387-403. doi: 10.1177/0271678x211032029
32. Beishon L, Vasilopoulos T, Salinet ASM, Levis B, Barnes S, Hills E, Ramesh P, Gkargkoula P, Minhas JS, Castro P, et al. Individual Patient Data Meta-Analysis of Dynamic Cerebral Autoregulation and Functional Outcome After Ischemic Stroke. *Stroke*. 2024. doi: 10.1161/strokeaha.123.045700
33. Castro P, Serrador JM, Rocha I, Sorond F, Azevedo E. Efficacy of Cerebral Autoregulation in Early Ischemic Stroke Predicts Smaller Infarcts and Better Outcome. *Front Neurol*. 2017;8:113. doi: 10.3389/fneur.2017.00113
34. Petersen NH, Ortega-Gutierrez S, Reccius A, Masurkar A, Huang A, Marshall RS. Dynamic cerebral autoregulation is transiently impaired for one week after large-vessel acute ischemic stroke. *Cerebrovasc Dis*. 2015;39:144-150. doi: 10.1159/000368595

35. Reinhard M, Wihler C, Roth M, Harloff A, Niesen WD, Timmer J, Weiller C, Hetzel A. Cerebral autoregulation dynamics in acute ischemic stroke after rtPA thrombolysis. *Cerebrovasc Dis*. 2008;26:147-155. doi: 10.1159/000139662
36. Phillip D, Schytz HW, Iversen HK, Selb J, Boas DA, Ashina M. Spontaneous low frequency oscillations in acute ischemic stroke? A near infrared spectroscopy (NIRS) study. *J Neurol Neurophysiol*. 2014;5:1000241.
37. Castro P, Azevedo E, Rocha I, Sorond F, Serrador JM. Chronic kidney disease and poor outcomes in ischemic stroke: is impaired cerebral autoregulation the missing link? *BMC Neurol*. 2018;18:21. doi: 10.1186/s12883-018-1025-4
38. Reinhard M, Roth M, Guschlbauer B, Harloff A, Timmer J, Czosnyka M, Hetzel A. Dynamic cerebral autoregulation in acute ischemic stroke assessed from spontaneous blood pressure fluctuations. *Stroke*. 2005;36:1684-1689. doi: 10.1161/01.STR.0000173183.36331.ee
39. Sheriff F, Castro P, Kozberg M, LaRose S, Monk A, Azevedo E, Li K, Jafari S, Rao S, Otite FO, et al. Dynamic Cerebral Autoregulation Post Endovascular Thrombectomy in Acute Ischemic Stroke. *Brain Sci*. 2020;10. doi: 10.3390/brainsci10090641
40. Panerai RB. Cerebral autoregulation: from models to clinical applications. *Cardiovasc Eng*. 2008;8:42-59. doi: 10.1007/s10558-007-9044-6
41. Eleveld N, Hoedemaekers CWE, van Kaam CR, Leijte GP, van den Brule JMD, Pickkers P, Aries MJH, Maurits NM, Elting JWJ. Near-Infrared Spectroscopy-Derived Dynamic Cerebral Autoregulation in Experimental Human Endotoxemia-An Exploratory Study. *Front Neurol*. 2021;12:695705. doi: 10.3389/fneur.2021.695705
42. Phillip D, Schytz HW. Spontaneous Low Frequency Oscillations in Acute Ischemic Stroke ? A Near Infrared Spectroscopy (NIRS) Study. *Journal of Neurology & Neurophysiology*. 2014;05. doi: 10.4172/2155-9562.1000241
43. Becker S, Klein F, König K, Mathys C, Liman T, Witt K. Assessment of dynamic cerebral autoregulation in near-infrared spectroscopy using short channels: A feasibility study in acute ischemic stroke patients. *Front Neurol*. 2022;13:1028864. doi: 10.3389/fneur.2022.1028864
44. Strangman GE, Li Z, Zhang Q. Depth Sensitivity and Source-Detector Separations for Near Infrared Spectroscopy Based on the Colin27 Brain Template. *PLOS ONE*. 2013;8:e66319. doi: 10.1371/journal.pone.0066319
45. Yücel MA, Selb J, Aasted CM, Petkov MP, Becerra L, Borsook D, Boas DA. Short separation regression improves statistical significance and better localizes the hemodynamic response obtained by near-infrared spectroscopy for tasks with differing autonomic responses. *Neurophotonics*. 2015;2:035005. doi: 10.1117/1.NPh.2.3.035005
46. Davie SN, Grocott HP. Impact of extracranial contamination on regional cerebral oxygen saturation: a comparison of three cerebral oximetry technologies. *Anesthesiology*. 2012;116:834-840. doi: 10.1097/ALN.0b013e31824c00d7
47. Sørensen H, Rasmussen P, Siebenmann C, Zaar M, Hvidtfeldt M, Ogoh S, Sato K, Kohl-Bareis M, Secher NH, Lundby C. Extra-cerebral oxygenation influence on near-infrared-spectroscopy-determined frontal lobe oxygenation in healthy volunteers: a comparison between INVOS-4100 and NIRO-200NX. *Clin Physiol Funct Imaging*. 2015;35:177-184. doi: 10.1111/cpf.12142

48. Elting JWJ, Tas J, Aries MJ, Czosnyka M, Maurits NM. Dynamic cerebral autoregulation estimates derived from near infrared spectroscopy and transcranial Doppler are similar after correction for transit time and blood flow and blood volume oscillations. *J Cereb Blood Flow Metab.* 2020;40:135-149. doi: 10.1177/0271678x18806107
49. Tas J, Eleveld N, Borg M, Bos KDJ, Langermans AP, van Kuijk SMJ, van der Horst ICC, Elting JWJ, Aries MJH. Cerebral Autoregulation Assessment Using the Near Infrared Spectroscopy 'NIRS-Only' High Frequency Methodology in Critically Ill Patients: A Prospective Cross-Sectional Study. *Cells.* 2022;11. doi: 10.3390/cells11142254
50. van den Dool REC, Sperna Weiland NH, Schenk J, Kho E, Veelo DP, van der Ster BJP, Immink RV. Dynamic cerebral autoregulation during step-wise increases in blood pressure during anaesthesia: A nonrandomised interventional trial. *Eur J Anaesthesiol.* 2023. doi: 10.1097/eja.0000000000001798
51. Guglielmi V, LeCouffe NE, Zinkstok SM, Compagne KCJ, Eker R, Treurniet KM, Tolhuisen ML, van der Worp HB, Jansen IGH, van Oostenbrugge RJ, et al. Collateral Circulation and Outcome in Atherosclerotic Versus Cardioembolic Cerebral Large Vessel Occlusion. *Stroke.* 2019;50:3360-3368. doi: 10.1161/strokeaha.119.026299
52. Tian G, Ji Z, Lin Z, Pan S, Yin J. Cerebral autoregulation is heterogeneous in different stroke mechanism of ischemic stroke caused by intracranial atherosclerotic stenosis. *Brain Behav.* 2021;11:e01907. doi: 10.1002/brb3.1907
53. Barber PA, Demchuk AM, Zhang J, Buchan AM. Validity and reliability of a quantitative computed tomography score in predicting outcome of hyperacute stroke before thrombolytic therapy. ASPECTS Study Group. Alberta Stroke Programme Early CT Score. *Lancet (London, England).* 2000;355:1670-1674. doi: 10.1016/s0140-6736(00)02237-6
54. Puetz V, Sylaja PN, Coutts SB, Hill MD, Dzialowski I, Mueller P, Becker U, Urban G, O'Reilly C, Barber PA, et al. Extent of hypoattenuation on CT angiography source images predicts functional outcome in patients with basilar artery occlusion. *Stroke.* 2008;39:2485-2490. doi: 10.1161/strokeaha.107.511162
55. Karippacheril JG, Ho TY. Data acquisition from S/5 GE Datex anesthesia monitor using VSCapture: An open source.NET/Mono tool. *J Anaesthesiol Clin Pharmacol.* 2013;29:423-424. doi: 10.4103/0970-9185.117096
56. De Georgia M, Bowen T, Duncan KR, Chebl AB. Blood pressure management in ischemic stroke patients undergoing mechanical thrombectomy. *Neurological Research and Practice.* 2023;5:12. doi: 10.1186/s42466-023-00238-8
57. Meel-van den Abeelen AS, Simpson DM, Wang LJ, Slump CH, Zhang R, Tarumi T, Rickards CA, Payne S, Mitsis GD, Kostoglou K, et al. Between-centre variability in transfer function analysis, a widely used method for linear quantification of the dynamic pressure-flow relation: the CARNet study. *Med Eng Phys.* 2014;36:620-627. doi: 10.1016/j.medengphy.2014.02.002
58. Panerai RB, Brassard P, Burma JS, Castro P, Claassen JA, van Lieshout JJ, Liu J, Lucas SJ, Minhas JS, Mitsis GD, et al. Transfer function analysis of dynamic cerebral autoregulation: A CARNet white paper 2022 update. *J Cereb Blood Flow Metab.* 2023;43:3-25. doi: 10.1177/0271678x221119760
59. Scholkmann F, Spichtig S, Muehlemann T, Wolf M. How to detect and reduce movement artifacts in near-infrared imaging using moving standard deviation and spline interpolation. *Physiol Meas.* 2010;31:649-662. doi: 10.1088/0967-3334/31/5/004

60. Deegan BM, Serrador JM, Nakagawa K, Jones E, Sorond FA, O'Leary DH. The effect of blood pressure calibrations and transcranial Doppler signal loss on transfer function estimates of cerebral autoregulation. *Med Eng Phys*. 2011;33:553-562. doi: 10.1016/j.medengphy.2010.12.007
61. Simpson DM, Payne SJ, Panerai RB. The INfoMATAS project: Methods for assessing cerebral autoregulation in stroke. *J Cereb Blood Flow Metab*. 2022;42:411-429. doi: 10.1177/0271678x211029049
62. Huppert TJ, Diamond SG, Franceschini MA, Boas DA. HomER: a review of time-series analysis methods for near-infrared spectroscopy of the brain. *Applied optics*. 2009;48:D280-298.
63. Phillip D, Schytz HW. Spontaneous Low Frequency Oscillations in Acute Ischemic Stroke ? A Near Infrared Spectroscopy (NIRS) Study. *Journal of Neurology & Neurophysiology*. 2014;05. doi: 10.4172/2155-9562.1000241



## Tables

Table 1. Baseline information and medical history.

|                                            | All enrolled<br>(n=77) | Follow-up<br>(n=54)  | No follow-up<br>(n=23) | P-<br>value |
|--------------------------------------------|------------------------|----------------------|------------------------|-------------|
| Age, median (IQR)                          | 73 (63; 80)            | 72 (63.3; 79.8)      | 75 (64.5; 80)          | 0.446       |
| Female sex, n (%)                          | 30 (39.0)              | 18 (33.3)            | 12 (52.2)              | 0.135       |
| Caucasian ethnicity, n (%)                 | 74 (96.1)              | 53 (98.1)            | 21 (91.3)              | 0.211       |
| Right-handed, n (%)                        | 66 (85.7)              | 47 (87.0)            | 19 (82.6)              | 0.724       |
| BMI, median (IQR)                          | 26 (23.0; 29.7)        | 26.3 (23.3;<br>29.7) | 25.1 (22.0; 28.1)      | 0.223       |
| Smoking, n (%)                             |                        |                      |                        | 0.480       |
| Never                                      | 23 (29.9)              | 17 (31.5)            | 6 (26.1)               |             |
| Former                                     | 29 (37.7)              | 18 (33.3)            | 11 (47.8)              |             |
| Current                                    | 25 (32.5)              | 19 (35.2)            | 6 (26.1)               |             |
| Medical history, n (%)                     |                        |                      |                        |             |
| Prior AIS                                  | 16 (20.8)              | 10 (18.5)            | 6 (26.1)               | 0.545       |
| Prior TIA                                  | 11 (13.0)              | 7 (13.0)             | 4 (17.4)               | 0.726       |
| Hypertension                               | 50 (64.9)              | 38 (70.4)            | 16 (69.6)              | 1.000       |
| Diabetes                                   | 10 (13.0)              | 6 (11.1)             | 4 (17.4)               | 0.474       |
| Extracranial artery stenosis $\geq$<br>50% | 33 (42.9)              | 25 (46.3)            | 8 (34.8)               | 0.453       |
| Ipsilateral                                | 30 (39)                | 24 (44.4)            | 6 (26.1)               | 0.201       |
| Contralateral                              | 27 (35.1)              | 16 (29.6)            | 2 (8.7)                | 0.075       |
| Intracranial artery stenosis               | 9 (11.7)               | 5 (9.3)              | 4 (17.4)               | 0.439       |
| Atrial fibrillation                        | 33 (42.9)              | 22 (40.7)            | 11 (47.8)              | 0.620       |

BMI: Body-mass index. AIS: Acute ischemic stroke. TIA: Transient ischemic attack.

Table 2. Index stroke, treatment, and outcome.

|                                                 | All enrolled<br>(n=77) | Follow-up<br>(n=54) | No follow-up<br>(n=23) | P-<br>value |
|-------------------------------------------------|------------------------|---------------------|------------------------|-------------|
| Ischemic hemisphere, right side, n (%)          | 44 (57.1)              | 32 (59.3)           | 12 (52.2)              | 0.746       |
| Onset, n (%)                                    |                        |                     |                        | 0.387       |
| Wake-up                                         | 19 (24.7)              | 11 (20.4)           | 8 (34.8)               |             |
| Unwitnessed                                     | 10 (13.0)              | 7 (13.0)            | 3 (13.0)               |             |
| Stroke etiology, n (%)                          |                        |                     |                        | 0.397       |
| Large-artery atherosclerosis                    | 28 (36.4)              | 21 (38.9)           | 7 (30.4)               |             |
| Cardio-aortic embolism                          | 27 (35.1)              | 18 (33.3)           | 9 (39.1)               |             |
| Other causes (dissection)                       | 5 (6.5)                | 2 (3.7)             | 3 (13)                 |             |
| Undetermined causes                             | 17 (22.1)              | 13 (24.1)           | 4 (17.4)               |             |
| IVT, n (%)                                      | 35 (45.5)              | 28 (51.9)           | 7 (30.4)               | 0.133       |
| Occluded artery, n (%)                          |                        |                     |                        |             |
| ICA                                             | 6 (7.8)                | 4 (7.4)             | 2 (8.7)                | 1.000       |
| ICA-top                                         | 14 (18.2)              | 10 (18.5)           | 4 (17.4)               | 1.000       |
| ICA-tandem                                      | 12 (15.6)              | 11 (20.4)           | 1 (4.3)                | 0.095       |
| M1                                              | 50 (64.9)              | 36 (66.7)           | 14 (60.9)              | 0.795       |
| M2                                              | 23 (29.9)              | 17 (31.5)           | 6 (26.1)               | 0.787       |
| ACA                                             | 8 (10.4)               | 5 (9.3)             | 3 (13.0)               | 0.690       |
| BA                                              | 5 (6.5)                | 2 (3.7)             | 3 (13.0)               | 0.154       |
| PCA                                             | 3 (3.9)                | 3 (5.6)             | 1 (4.3)                | 1.000       |
| ASPECTS / PC-ASPECTS, median (IQR)              |                        |                     |                        |             |
| Before EVT                                      | 8 (6; 10)              | 9 (7; 10)           | 7 (6; 8.5)             | 0.081       |
| 24-hour                                         | 7 (5; 8)               | 7 (6; 8.75)         | 5 (3; 7)               | 0.002       |
| Successful reperfusion (mTICI $\geq$ 2b), n (%) | 69 (89.6)              | 51 (94.4)           | 18 (78.3)              | 0.047       |
| Last-known-well to reperfusion*                 | 294 (202; 625)         | 280 (178; 523)      | 344 (283; 887)         | 0.033       |
| NIHSS, median (IQR)                             |                        |                     |                        |             |
| Before EVT                                      | 16.5 (11; 21.25)       | 15 (9.25; 20)       | 20 (14.25; 23.75)      | 0.026       |
| 24-hour                                         | 6 (3; 13.25)           | 5 (3; 9)            | 16 (8.5; 20.75)        | <0.001      |
| 90-day                                          | N/A                    | 2 (1; 4)            | N/A                    |             |
| 90-day mRS, median (IQR)                        | 3 (1; 4)               | 2 (1; 3)            | 6 (4; 6)               | <0.001      |
| 90-day independence <sup>†</sup> , n (%)        | 36 (46.8)              | 32 (59.2)           | 4 (16.7)               | 0.001       |
| Vascular events <sup>‡</sup> , n (%)            | 5 (6.5)                | 2 (3.7)             | 3 (13)                 | 0.154       |
| All-cause mortality, n (%)                      |                        |                     |                        |             |
| 90-day                                          | 13 (16.9)              | 0 (0)               | 13 (56.5)              | <0.001      |
| 1 year                                          | 19 (24.7)              | 4 (7.4)             | 15 (65.2)              | <0.001      |

*IVT: Intravenous thrombolysis. ICA: Internal carotid artery. M1: First part of middle cerebral artery. M2: Second part of middle cerebral artery. ACA: Anterior cerebral artery. BA: Basilar artery. PCA: Posterior cerebral artery. ASPECTS: Alberta Stroke Program Early CT Score. PC-ASPECTS: Posterior circulation ASPECTS. mTICI: Modified treatment in cerebral infarction. NIHSS: National Institutes of Health Stroke Scale. EVT: Endovascular treatment. \*: In case of mTICI 0, defined as time of abandoning EVT efforts. †: Modified Rankin Scale 0-2. ‡: Defined as recurrent stroke, myocardial infarction, or surgery for peripheral artery disease at 90-day FU.*

## Figures

Figure 1. Enrollment and exclusion process. NIRS: Near-infrared spectroscopy. EVT: Endovascular treatment. TFA: Transfer function analysis. FU: Follow-up.

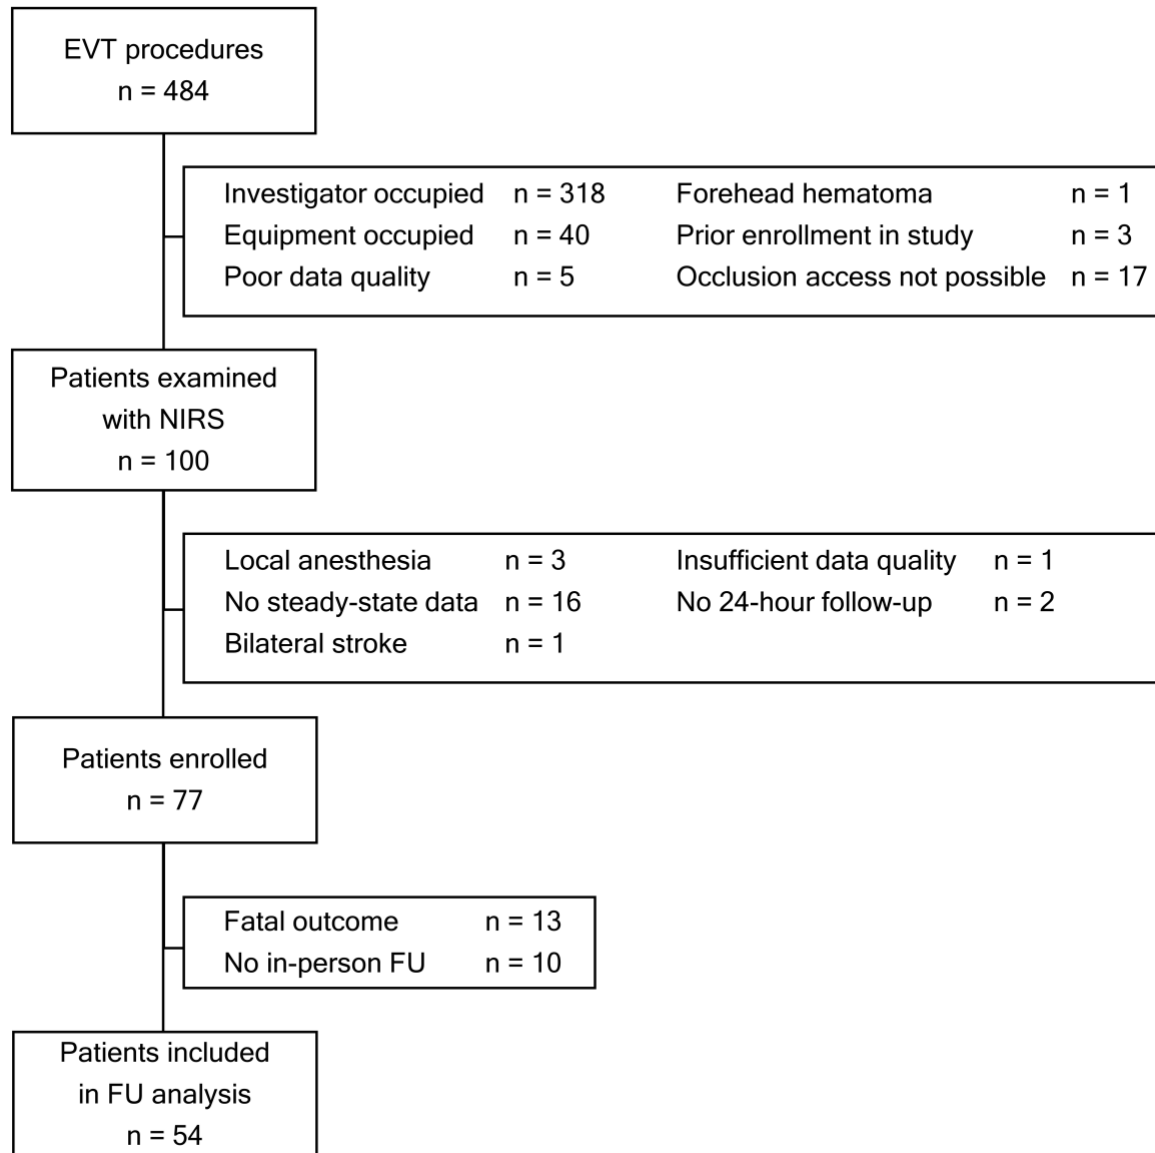

Figure 2. Interaction between time segment and NIHSS in 90-day subsets. (a) Shown as continuous NIHSS (actual model). Non-parallel regression lines indicate interaction clearly seen for POST. (b) Trichotomized NIHSS before EVT (approximation model to illustrate interaction over time segments).

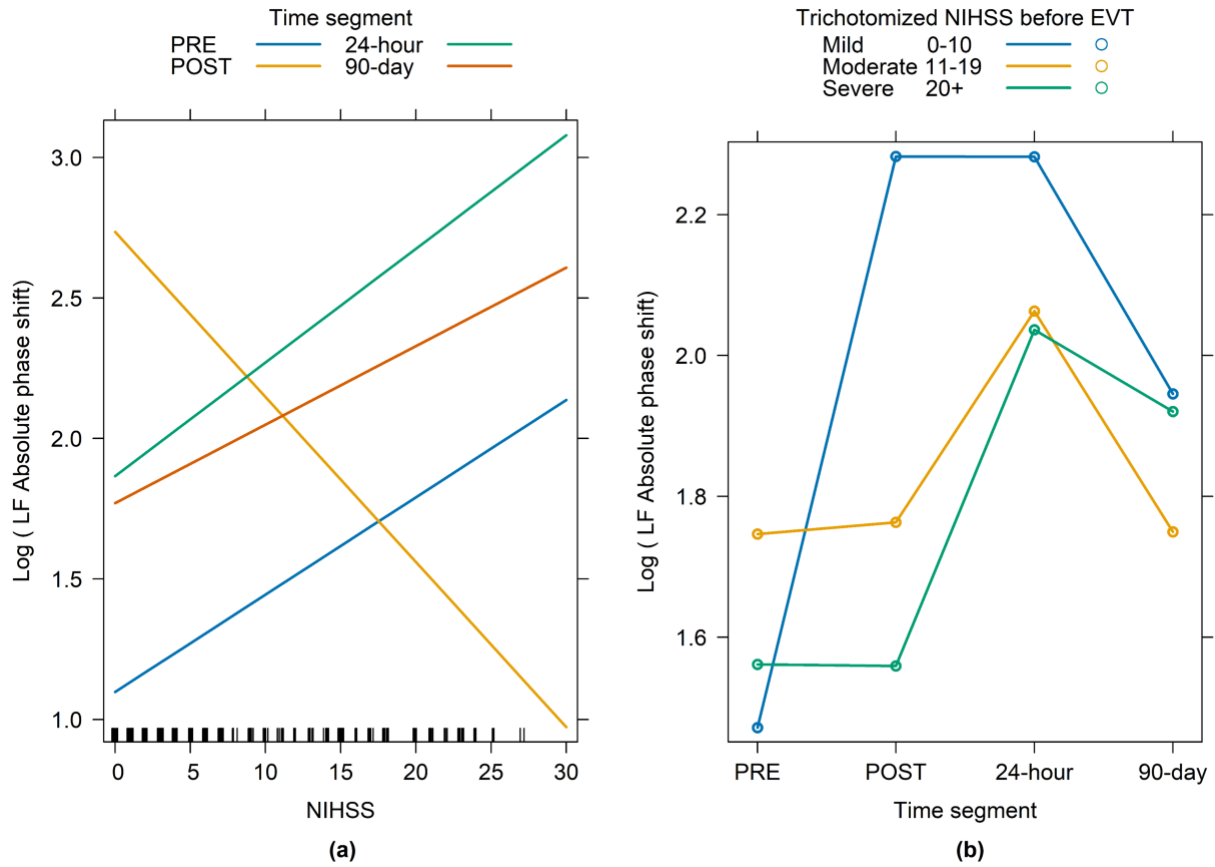

Figure 3. Predicted probabilities of initial LF gain on categorized NIHSS.

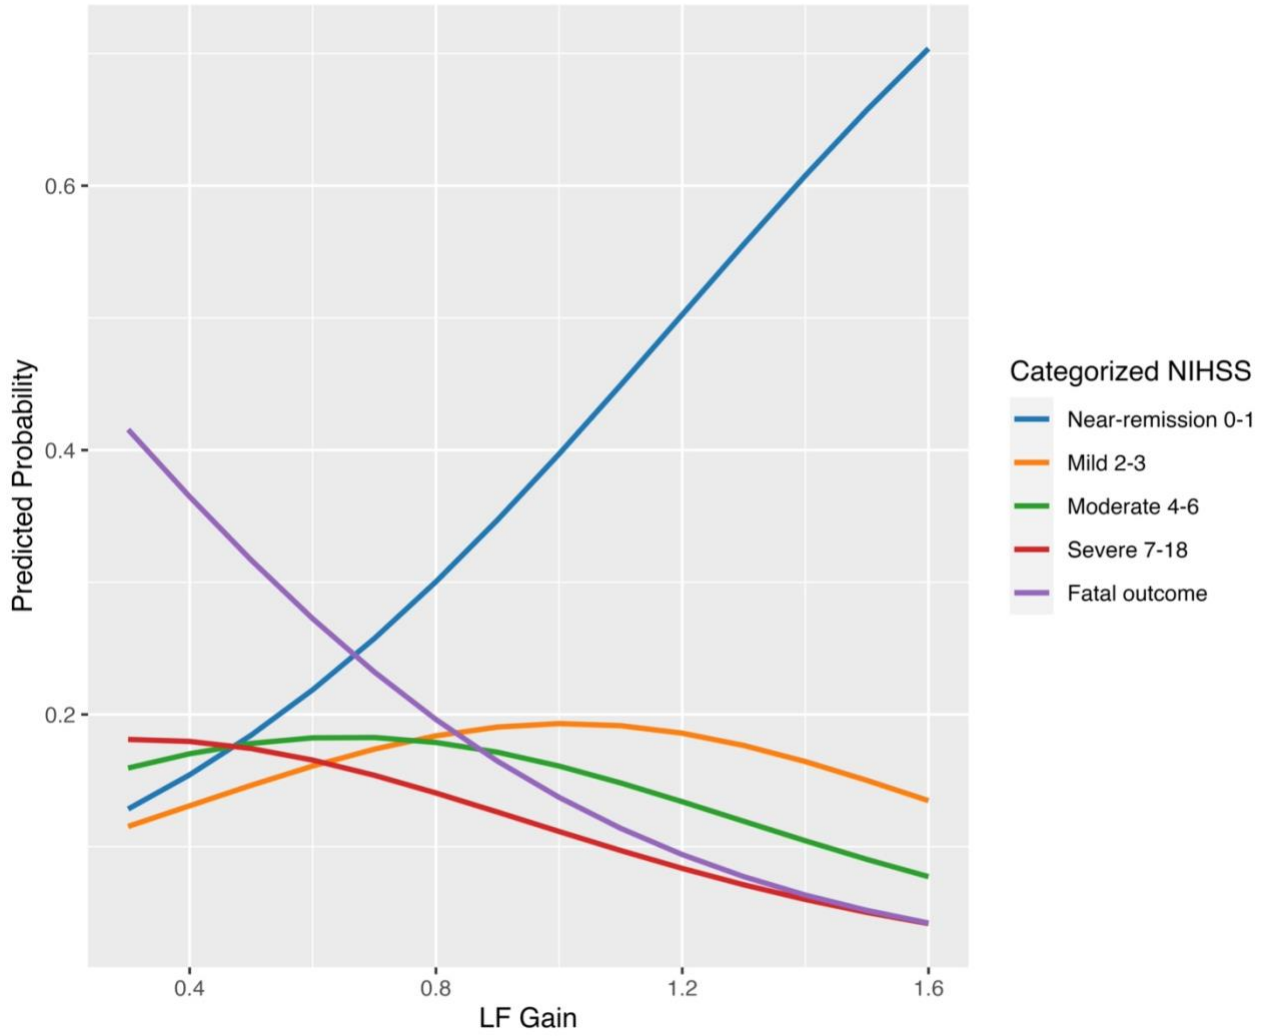

Source: https://medrxiv.org/content/10.1101/2024.09.05.24313166v1.full.pdf
